1 **Title**

2 Targeting the MYC interaction network in B-cell lymphoma via histone deacetylase 6  
3 inhibition

4 **Running title**

5 Targeting MYC in lymphoma via HDAC6 inhibition

6 **Authors and affiliations**

7 René Winkler<sup>1\*</sup>, Ann-Sophie Mägdefrau<sup>1\*</sup>, Markus Kleemann<sup>1</sup>, Mandy Beyer<sup>2</sup>, Kevin  
8 Linke<sup>1</sup>, Lisa Hansen<sup>1</sup>, Anna-Maria Schaffer<sup>1,3</sup>, Marina E. Hoffmann<sup>4</sup>, Simon Poepsel<sup>5,6</sup>,  
9 Florian Heyd<sup>7</sup>, Petra Beli<sup>4</sup>, Tarik Möröy<sup>8</sup>, Siavosh Mahboobi<sup>9</sup>, Oliver H. Krämer<sup>2</sup>, and  
10 Christian Kosan<sup>1</sup>

11 <sup>1</sup>Department of Biochemistry, Center for Molecular Biomedicine (CMB), Friedrich Schiller  
12 University Jena, Jena, 07745, Germany.

13 <sup>2</sup>Institute of Toxicology, University Medical Center Mainz, Mainz, 55131, Germany.

14 <sup>3</sup>Department of Immunology, Institute for Biology III, University of Freiburg, Freiburg,  
15 79104, Germany.

16 <sup>4</sup>Institute of Molecular Biology (IMB), Mainz, 55128, Germany.

17 <sup>5</sup>Center for Molecular Medicine Cologne (CMMC), University of Cologne, Cologne, 50931,  
18 Germany.

19 <sup>6</sup>CECAD Research Center, Cologne, 50931, Germany.

20 <sup>7</sup>Institute of Chemistry and Biochemistry, Laboratory of RNA Biochemistry, Freie  
21 Universität Berlin, Berlin, 14195, Germany.

22 <sup>8</sup>Institut de Recherches Cliniques de Montréal (IRCM), Montréal, QC, H2W 1R7, Canada.

23 <sup>9</sup>Department of Pharmaceutical/Medicinal Chemistry I, Institute of Pharmacy, University  
24 of Regensburg, Regensburg, 93040, Germany.

25 \*These authors contributed equally.

26 **Keywords:** MYC, HDAC6, B-cell lymphoma, HDAC inhibitor, heat-shock proteins

27 **Additional information**

28 **Financial support**

29 R.W. was supported by a scholarship from the Carl Zeiss Foundation. C.K. received  
30 funding from the Deutsche Forschungsgemeinschaft (DFG, German Research  
31 Foundation), GRK 1715. Work done in the group of O.H.K. was done by M.B. and funded  
32 by DFG, Project-ID 393547839 – SFB 1361 and DFG, GRK 2291/9-1.

33 **Corresponding author**

34 Christian Kosan, Department of Biochemistry, Center for Molecular Biomedicine (CMB),  
35 Friedrich Schiller University Jena, Hans-Knöll-Str. 2, Jena, 07745, Germany,  
36 christian.kosan@uni-jena.de, phone: +49 3641 949368.

37 **Disclosure of conflicts of interest**

38 The authors declare no potential conflicts of interest.

39

40 **Text word count: 4662**

41 **Abstract word count: 169**

42 **Number of figures: 7**

43 **Number of references: 50**

44 **Abstract**

45 Overexpression of oncogenic *MYC* is the hallmark of many lymphomas and is related to  
46 a poor prognosis. Although *MYC* is a potential cancer driver, therapeutic targeting is still  
47 challenging. Here, we report that histone deacetylase 6 (HDAC6) inhibition using the novel  
48 inhibitor Marbostat-100 (M-100) specifically alters protein-protein interactions in *MYC*-  
49 dependent cancer cells and targets *MYC* for proteasomal degradation. Subsequently,  
50 massive apoptosis is induced in *MYC*-overexpressing B-cell lymphoma cells after M-100  
51 treatment. Besides, the application of M-100 prevents lymphoma formation in E $\mu$ -Myc  
52 transgenic mice and efficiently slows down tumor growth in already manifested  
53 lymphomas. Moreover, M-100 exclusively targets *MYC*-dependent tumor cells with little  
54 or no side effects on non-tumor cells and tissues. HDAC6 inhibition results in pleiotropic  
55 cellular effects, such as hyperacetylation of Tubulin. We propose a mechanism where the  
56 heat-shock protein DNAJA3 associates with acetylated Tubulin to control *MYC* turnover  
57 in malignant cells. Our data show a new mechanism how HDAC6 inhibition targets  
58 oncogenic *MYC* in lymphomas and demonstrate a beneficial role of HDAC6 inhibition in  
59 *MYC*-dependent B-cell lymphoma.

## 60 Introduction

61 B-cells are prone to lymphomagenesis due to their high proliferative capacity and  
62 dependence on physiological DNA damage during V(D)J recombination and affinity  
63 maturation in germinal centers (1). Non-Hodgkin's lymphomas, such as Burkitt's  
64 lymphoma (BL) and diffuse large B-cell lymphoma (DLBCL) are aggressive  
65 heterogeneous lymphomas characterized by a difference in response to clinical treatment  
66 (2). BL is typically arising from germinal center B-cells and is often characterized by  
67 translocations of *MYC* to the vicinity of potent immunoglobulin enhancers, such as t(8;14)  
68 (1). DLBCL originates from various molecular alterations, among them translocations of  
69 *BCL-6* or the anti-apoptotic factor *BCL-2* (1). However, *MYC* translocations occur in  
70 around 15 % of DLBCL (2), and elevated expression of *MYC* is correlated with poor clinical  
71 outcome in B-cell lymphoma (3,4). Overexpression of the transcription factor *MYC* leads  
72 to fatal mis-regulations of cellular metabolism, cell growth, and signaling pathways (5,6).  
73 Moreover, *MYC* controls proliferation, angiogenesis, and mRNA processing in tumors  
74 (7,8). Oncogenic *MYC* can recruit epigenetic modifiers, such as p300/CBP or histone  
75 deacetylases (HDACs) HDAC1 and HDAC3 to activate or repress distinct genes in cancer  
76 cells (8).

77 Pan-HDAC inhibitors (HDACi) targeting several HDACs have been shown to give  
78 promising results in hematologic malignancies (9–11). The regulation of non-histone  
79 proteins, in particular proto-oncogenes, by HDACi enables the control of many essential  
80 cellular processes, such as cell survival, proliferation, protein stability, and protein  
81 interaction (12). For example, pan-HDACi treatment has been shown to inhibit *BCL-6*  
82 function by inducing *BCL-6* acetylation, which leads to the de-repression of its target  
83 genes (13). Interestingly, *MYC* can also be found acetylated at K423 upon pan-HDACi  
84 treatment, which decreases *MYC* transcription via autoregulation and results in apoptosis  
85 (10). Targeting singular HDACs with HDACi dissolves separate HDAC member function  
86 in hematologic malignancies. For example, treatment of DLBCL with the HDAC6 inhibitor  
87 *ACY-1215* (Rocilinostat) activates the unfolded protein response by increasing quantity  
88 and acetylation of heat-shock proteins (HSPs), eventually resulting in cell death (14).

89 Importantly, oncogenic *MYC* has a half-life of about 35 min when transiently expressed  
90 (15). This high turn-over rate makes *MYC* a difficult target for direct inhibition. Attempts to

91 directly target MYC via small molecules did not achieve adequate results as these drugs  
92 underwent rapid degradation and showed unfavorably high IC<sub>50</sub> values (16). In fact,  
93 physiological MYC fulfills crucial functions in many cell types, and pharmacological  
94 targeting of MYC should only counteract supraphysiological MYC levels in malignant cells  
95 to avoid severe side effects.

96 Here, we describe a novel targeting strategy for MYC-dependent B-cell lymphoma. The  
97 highly-specific HDAC6 inhibitor Marbostat-100 (M-100) induces degradation of oncogenic  
98 MYC and subsequent apoptosis in B-cell lymphoma, with little or no side effects on non-  
99 tumor cells and tissues. We uncover a cytoplasmic interaction network formed by Tubulin,  
100 HDAC6, and HSPs that regulates protein stability of oncogenic MYC. Our results extend  
101 current knowledge on MYC in B-cell lymphomagenesis and show a new approach to  
102 target oncogenic MYC in cancer.

103

## 104 **Materials and methods**

105 For detailed methods, please refer to the supplementary data.

### 106 ***In vivo* animal studies**

107 Female and male C57BL/6JRj and Tg(IghMyc)22Bri ("E $\mu$ -Myc") mice with C57BL/6JRj  
108 background were housed in individually ventilated cages in groups under specific-  
109 pathogen-free conditions in the Experimental Biomedicine Unit at the University of Jena,  
110 Germany. Mice were bred according to registration number 02-053/16, and all  
111 experimental procedures were approved by the federal Thuringian "Landesamt für  
112 Verbraucherschutz" under registration number 02-030/15. All legal specifications were  
113 followed regarding European guidelines 2010/63/EU. Mice were randomly assigned to  
114 different treatment groups and sacrificed by cervical dislocation or CO<sub>2</sub> inhalation. For  
115 intraperitoneal injections, M-100 was solved in 7.5 % N-methyl-2-pyrrolidone (Carl Roth  
116 GmbH, Cat#P052) and 40 % PEG-400 (Carl-Roth, Cat#0144) in sterile water.

### 117 **Cell lines and primary cultures**

118 All cell lines were maintained in incubators at 37 °C and 5 % CO<sub>2</sub>. 293T and NIH-3T3 cells  
119 were grown in DMEM with 10 % FCS. Ramos and Raji cells were grown in RPMI 1640  
120 with 10 % FCS. BL-30 cells were grown in RPMI 1640 with 20 % FCS. OCI-Ly3, SUDHL-6,  
121 and CH12F3 cells were grown in RPMI 1640, supplemented with 10 % FCS, 50  $\mu$ M  
122  $\beta$ -mercaptoethanol, 10 mM HEPES. CH12F3 cells were activated by stimulation with  
123 1  $\mu$ g/ml CD40L (Thermo Fisher Scientific Inc., Cat#16-0402-81, RRID:AB\_468944),  
124 5 ng/ml IL-4 (Thermo Fisher Scientific Inc., Cat#14-8041-62) and 1 ng/ml TGF- $\beta$ 1 (Cell  
125 Signaling Technology, Cat#8915). All cell lines were tested regularly for *Mycoplasma*  
126 infection and only negatively tested cell lines were used. Isolation of primary B-cells was  
127 performed as previously described (17). Primary B-cells were grown in RPMI 1640 with  
128 10 % FCS, 50  $\mu$ M  $\beta$ -mercaptoethanol, 10 mM HEPES and 0.5 % gentamicin. Activation  
129 of primary B-cells was induced by the addition of 10  $\mu$ g/ml LPS (from *E. coli*, O111:B4,  
130 Sigma-Aldrich Inc., Cat#L4391). Ramos cells were authenticated by Eurofins Genomics  
131 (Ebersberg, Germany). *MYC* mutation data are derived from the CCLE and COSMIC  
132 databases (18,19). M-100 was dissolved to a 10 mM stock solution with DMSO and diluted

133 to a concentration of 100  $\mu$ M with PBS. Distribution of M-100 is restricted due to patent  
134 rights (patent number WO2016020369 A1).

### 135 **Flow cytometry**

136 All measurements were performed using a LSR Fortessa system (BD Biosciences Inc.),  
137 and data were acquired with BD FACSDIVA V8.0.1 (BD Biosciences Inc.). Immune cell  
138 phenotyping was performed by staining single-cell suspensions in PBS with respective  
139 antibodies (see Supplemental Data). For apoptosis detection, an Annexin V-FITC  
140 Apoptosis Detection Kit (Thermo Fisher Scientific Inc., RRID:AB\_2575600) was used. Cell  
141 cycle analysis was performed by PI incorporation. Flow cytometry data were analyzed  
142 with FlowLogic 700.2A (Inivai Technologies Pty. Ltd.).

### 143 **CRISPR/Cas9-mediated deletion of *HDAC6***

144 The CRISPR/Cas9-system was utilized to delete *HDAC6* in Ramos cells with the following  
145 crRNA: *GCCGGUUGAGGUCAUAGUUGGUUUUAGAGCUAUGCU*. Oligonucleotides  
146 Alt-R CRISPR-Cas9 tracrRNA, ATTO 550 (Integrated DNA Technologies, Inc.,  
147 Cat#1075927) and Alt-R CRISPR-Cas9 crRNA (Integrated DNA Technologies, Inc.) were  
148 mixed for targeted deletion to a final duplex concentration of 100  $\mu$ M, heated for 5 min at  
149 95 °C and cooled down to RT. The formation of ribonucleoprotein complexes was  
150 achieved by mixing 120 pmol RNA duplex and 104 pmol Alt-R S. p. Cas9 Nuclease 3NLS  
151 (Integrated DNA Technologies, Inc., Cat# 1074181) with PBS to a final volume of 5  $\mu$ l.  
152 The mixture was incubated for 20 min at RT and electroporated into Ramos cells using  
153 Cell Line Nucleofector Kit V (Lonza, Cat#VACA-1003) according to the manufacturer's  
154 protocol. In short, Ramos cells were washed once with PBS and resuspended in  
155 Nucleofector solution V. Then, ribonucleoprotein complexes and Alt-R Cas9  
156 Electroporation Enhancer (Integrated DNA Technologies, Inc., Cat#1075915) were mixed  
157 with cells by pipetting, transferred to a cuvette and electroporation was performed in an  
158 Amaxa Nucleofector device (Lonza, program 0-06). Electroporated cells were  
159 resuspended in pre-warmed medium and cultivated. After 24 h, dead cells were eliminated  
160 using the Dead Cell Removal Kit (Miltenyi Biotec, Cat#130-090-101) according to the  
161 manufacturer's protocol. Electroporated cells were sorted after an additional 24 h using  
162 ATTO 550 label (BD FACSAria III, BD Biosciences Inc.), and expanded as single-cell

163 clones in 96-well plates. Proteins were separated with SDS-PAGE and analyzed using  
164 Western Blot to check for genomic deletion. The genomic region of interest was amplified  
165 by conventional PCR and sequenced (Eurofins Genomics).

## 166 **RNA isolation**

167 High-quality RNA was isolated using the Direct-zol RNA Miniprep Kit (Zymo Research,  
168 Cat#R2052). In short, cells were lysed in RNAPure peqGOLD (VWR International Ltd.,  
169 Cat#30-1010) and mixed with an equal volume of 95 % (v/v) ethanol. RNA was bound to  
170 columns, washed, and subject to on-column-digestion with DNase I (30 U; included in the  
171 kit) for 15 min at RT according to the manufacturer's protocol. RNA was eluted in RNase-  
172 free water (included in the kit). The purity of RNA was measured by absorption at  $\lambda=230$   
173 nm,  $\lambda=260$  nm, and  $\lambda=280$  nm using a photometer (VWR International Ltd., ND-1000).

## 174 **Quantitative real-time PCR**

175 For quantitative real-time PCR experiments, cDNA was generated from up to 1  $\mu$ g RNA  
176 using First Strand cDNA Synthesis Kit (Thermo Fisher Scientific Inc., Cat#K1612)  
177 according to the manufacturer's protocol, and an equally mixed combination of oligo-  
178 (dT)18 and random hexamer primers. Runs were performed on a StepOnePlus Real-Time  
179 PCR system (Thermo Fisher Scientific Inc.) using StepOne Software v2.3 (Life  
180 Technologies). PowerUp SYBR Green Master Mix (Thermo Fisher Scientific Inc.,  
181 Cat#A25778) was combined with specific primers (200 pmol) and 5 ng cDNAs for a single  
182 reaction in 96-well plates (MicroAmp Fast Optical 96-well reaction plate, Applied  
183 Biosystems, Cat#4346906) sealed with MicroAmp Clear Adhesive Film (Applied  
184 Biosystems, Cat#4306311). Technical triplets and negative controls were prepared for  
185 each reaction. Polymerase started amplification after an initial denaturation step at 95 °C,  
186 and all annealing steps were performed at 60 °C. Melting curves were generated for each  
187 primer pair. Data analysis was performed using the comparative  $\Delta\Delta$ CT method.

## 188 **Proximity ligation assay**

189 PLA was performed using Duolink In Situ PLA Reagents Red (Sigma Aldrich Inc.,  
190 Cat#DUO92008) according to the manufacturer's protocol. Ramos cells were attached to  
191 coverslips with 0.1 % poly-L-lysine (Sigma Aldrich Inc., Cat#P8920) for 1 h at RT. Cells  
192 were permeabilized, fixed with methanol for 10 min at -20 °C, blocked with Duolink



193 blocking solution, and incubated with primary antibodies. PLA Probe Anti-Mouse MINUS  
194 (Sigma Aldrich Inc.) and PLA Probe Anti-Rabbit PLUS (Sigma Aldrich Inc.) were used as  
195 secondary probes. Samples were mounted with DAPI. PLA signals were detected using  
196 a Nikon Ti Microscope ( $\lambda_{ex}=594$  nm;  $\lambda_{em}=624$  nm). Images were taken with a Nikon DS-  
197 Qi2 camera.

## 198 **Cell fractionation**

199 Cells were washed twice in PBS and centrifuged for 5 min at 700 g, RT. Then, pellets  
200 were resuspended in ice-cold cytoplasmic extraction buffer (10 mM HEPES-KOH, pH 7.6,  
201 15 mM KCl, 2 mM MgCl<sub>2</sub>, 0.1 mM EDTA, freshly prepared 1 mM DTT, protease inhibitors)  
202 and incubated for 10 min on ice. Suspensions were centrifuged for 5 min at 700 g, RT,  
203 and supernatant (cytoplasmic extract) was collected. Residual pellets were washed twice  
204 in PBS and centrifuged for 5 min at 700 g, RT. Pellets were resuspended in ice-cold  
205 nuclear extraction buffer (20 mM HEPES-KOH, pH 7.9, 420 mM NaCl, 2 mM MgCl<sub>2</sub>,  
206 0.2 mM EDTA, 25 % (v/v) glycerin, 1 mM DTT; protease inhibitors) and incubated for  
207 15 min at 4 °C. The supernatant (nuclear extract) was transferred into new reaction tubes  
208 after centrifugation for 10 min at 10000g and sonicated for 5 min using a water-bath  
209 sonicator (SONOREX SUPER RK106, Bandelin).

## 210 **Immunoprecipitation**

211 Protein levels were determined using the Roti-Nanoquant solution (Carl Roth GmbH,  
212 Cat#K880). For IPs, lysates containing 250 µg (overexpressed) or 1000 µg (endogenous)  
213 protein were combined with a mixture of 50 % (v/v) protein A and 50 % (v/v) protein G  
214 beads (Sigma-Aldrich Inc., Cat#P9424 and Cat#P3296) and 0.5-1 µg antibody in lysis  
215 buffer overnight at 4 °C. Following control antibodies were used: Mouse IgG control (Santa  
216 Cruz Biotechnology, Cat#sc-2025, RRID:AB\_737182), Rabbit IgG control (Santa Cruz  
217 Biotechnology, Cat#sc-2027, RRID:AB\_737197). Beads were washed three times in lysis  
218 buffer after incubation, resuspended in 2x Laemmli buffer to a final 1x concentration, and  
219 boiled for 5 min at 95 °C.

220

## 221 Results

### 222 HDAC6 inhibition increases the survival of lymphoma-prone E $\mu$ -Myc mice.

223 E $\mu$ -Myc mice are a commonly used model for studying the spontaneous formation of B-cell  
224 lymphomas due to B-cell-specific overexpression of *Myc*, resembling partially disease  
225 phenotypes of BL or DLBCL (20). To test the biological effect of the HDAC6 inhibitor  
226 M-100 on mice *in vivo*, we applied M-100 at 30 mg/kg or vehicle to 70-day-old wild-type  
227 or E $\mu$ -Myc mice via intraperitoneal (i.p.) injection. Acetylation (Ac-) of the HDAC6  
228 substrate Tubulin was increased in splenic cells 6 h and 72 h post treatment, indicating  
229 efficient HDAC6 inhibition (**Supplemental Figure 1A, B**). Short-term M-100 treatment did  
230 not change splenic B- and T-cell populations in E $\mu$ -Myc and wild-type mice, and myeloid  
231 cells were only slightly reduced (**Supplemental Figure 1C-E**).

232 To study the long-term effect of M-100 on lymphomagenesis, 70-day-old E $\mu$ -Myc mice  
233 that have a high incidence for lymphoma development (21), received i.p. injections with  
234 M-100 or vehicle twice a week for six weeks. Mice were monitored for another six weeks  
235 to check for spontaneous tumor formation after M-100 withdrawal. The survival of M-100-  
236 treated E $\mu$ -Myc mice was significantly increased compared to vehicle-treated and  
237 untreated mice (**Figure 1A**). While 60 % of the vehicle-treated E $\mu$ -Myc mice developed  
238 lymphomas during this period, only one out of 17 M-100-treated animals manifested a  
239 lymphoma. Interestingly, the beneficial effect of M-100 lasted even 6 weeks after M-100  
240 withdrawal. Phenotyping of lymphomas from the vehicle group showed an expected 2:1  
241 ratio of IgM<sup>-</sup> to IgM<sup>+</sup> B-cell tumors (**Figure 1B**), as previously published (22). The mean  
242 spleen weight from the vehicle cohort was 265 mg compared to 120 mg from the M-100  
243 cohort, indicating reduced disease progression (**Figure 1C**). Of note, long-term treatment  
244 with M-100 did not affect the body weight of mice (**Supplemental Figure 1F**). We  
245 analyzed lymphoid organs of surviving mice after the end of the experiment by flow  
246 cytometry. No differences were observed in B-cell populations between treatment groups  
247 because mice with increased percentage of B-cells showed lymphoma manifestation  
248 before reaching the defined endpoint (**Figure 1D**). However, survivors from the M-100  
249 cohort showed a significant decline in myeloid cells and an increase in T-cells compared  
250 to the vehicle group (**Figure 1D**). Thus, shifted immune cell populations caused by long-  
251 term HDAC6 inhibition might prevent B-cell lymphomagenesis in E $\mu$ -Myc mice.

252 Next, we assessed the curative potential of M-100 on already manifested lymphomas. We  
253 treated lymphoma-bearing E $\mu$ -Myc mice with M-100 and analyzed their survival. Acute  
254 M-100 treatment significantly improved survival compared to receiving no treatment  
255 (**Figure 1E**). Taken together, long-term HDAC6 inhibition strongly reduces B-cell  
256 lymphomagenesis in mice overexpression *Myc*.

### 257 **M-100 specifically induces apoptosis in lymphoma B-cells.**

258 To test direct effects of M-100 on lymphoma cells, we treated purified B-cells from E $\mu$ -  
259 Myc mice for 72 h with increasing amounts of M-100 (**Figure 2A**). Purified B-cells from  
260 wild-type mice were activated with 10  $\mu$ g/ml LPS and served as control. B-cells from *Myc*-  
261 driven lymphomas showed a strong induction of apoptosis already after treatment with  
262 1  $\mu$ M M-100. Next, we determined the IC<sub>50</sub> of M-100 on lymphoma B-cells from E $\mu$ -Myc  
263 mice as 5.46  $\mu$ M (**Figure 2B**). Interestingly, proliferating B-cells from wild-type mice did  
264 not undergo apoptosis after M-100 treatment (**Figure 2A**). We also assessed the effect of  
265 M-100 on the cell cycle of lymphoma cells and activated wild-type B-cells. Murine  
266 lymphoma cells showed a significant increase of cells in the subG1 fraction, indicating  
267 apoptosis, and a reduction in G1/S-phases 72 h after M-100 treatment (**Figure 2C**).  
268 However, non-malignant B-cells did not show any altered cell cycle progression  
269 (**Figure 2C**). Similarly, CH12F3 cells, a murine B-cell line harboring no *Myc* translocation  
270 (23), did not show increased subG1 fraction after M-100 treatment (**Figure 2D**).

271 On a molecular basis, we detected a strong acetylation of Tubulin concluding efficient  
272 Hdac6 inhibition by M-100 in murine B-cells from wild-type mice *ex vivo* (**Figure 2E**) which  
273 is a striking result as M-100 was developed against human HDAC6 (24,25). Wild-type  
274 B-cells upregulated the anti-apoptotic factor Bcl-2 in response to M-100 treatment  
275 (**Figure 2E**). However, Bcl-2 protein levels remained unchanged in E $\mu$ -Myc lymphoma  
276 cells upon M-100 treatment (**Figure 2F**). Instead, Parp-1 cleavage, a marker of apoptosis,  
277 occurred 24 h after M-100 treatment in murine lymphoma cells (**Figure 2F**). Besides,  
278 transcription of *Bbc3* and *Pmaip1*, encoding pro-apoptotic Puma and Noxa, was increased  
279 and *Bcl-2* expression, measured for two transcripts, was decreased 24 h after M-100  
280 treatment (**Figure 2G**). M-100 did not alter transcription of *Myc* (**Figure 2G**). Taken  
281 together, these findings clearly indicate that M-100 exclusively targets murine lymphoma  
282 cells with elevated *Myc* levels and induces apoptosis by preventing upregulation of Bcl-2.

283 **HDAC6 inhibition induces apoptosis in human B-cell lymphoma cell lines.**

284 We also wanted to assess the response of human B-cell lymphoma cell lines to M-100 in  
285 different BL and DLBCL cell lines. All used cell lines are characterized by *MYC*  
286 translocations or amplifications (26–31) but the individual *MYC* mutation profile differs  
287 heavily (**Figure 3A**). M-100 treatment resulted in a dose-dependent induction of apoptosis  
288 in human BL cell lines Ramos and Raji as demonstrated by the accumulation of  
289 Annexin V<sup>+</sup> cells (**Figure 3B**). In fact, all tested lymphoma cell lines showed a significant  
290 increase of Annexin V<sup>+</sup> cells after M-100 treatment (**Figure 3C**). We determined the  
291 efficacy of M-100 by MTT assay, and four out of five tested cell lines showed striking dose-  
292 responses to M-100 (**Figure 3D**). The obtained IC<sub>50</sub> values ranged between 2.07 μM and  
293 5.25 μM M-100. Raji cells, however, were less sensitive (IC<sub>50</sub>=17.17 μM), although a  
294 substantial apoptosis induction was achieved at 4 μM M-100 (**Figure 3C**). Taken together,  
295 M-100 treatment resulted in cell death of a wide range of human *MYC*-dependent BL and  
296 DLBCL lymphoma cells.

297 Consistent with our findings from Eμ-Myc lymphoma cells, we detected a significant  
298 increase of subG1 fractions 72 h post M-100 treatment in human lymphoma cell lines  
299 (**Figure 3E**), and a reduced entry into S-phase already 24 h post treatment  
300 (**Supplemental Figure 2A, B**). Only BL-30 cells showed an unaltered cell cycle profile,  
301 which might be explained by the high mutation rate within the *MYC* gene (**Figure 3A, E**).  
302 To confirm the apoptotic response of lymphoma cells to M-100, combinatorial treatment  
303 of M-100 and the caspase-specific inhibitor Z-VAD-FMK was performed (**Supplemental**  
304 **Figure 2C**). The use of Z-VAD-FMK remarkably reduced the occurrence of early apoptotic  
305 cells in M-100-treated Ramos cells (**Supplemental Figure 2D**). This highlights again that  
306 cell death induction by M-100 is facilitated via the apoptotic pathway.

307 **M-100 is a highly-specific HDAC6 inhibitor.**

308 The HDAC6 inhibitor ACY-1215 is currently undergoing clinical trials but with modest  
309 results (32). We wanted to analyze if targeting properties of M-100 are superior to  
310 ACY-1215 and compared both inhibitors. ACY-1215 and M-100 caused a strong  
311 hyperacetylation of Tubulin in Ramos cells (**Figure 4A**). However, ACY-1215 treatment  
312 also resulted in off-target effects at 4 μM, such as histone H3 acetylation which was similar

313 to effects of the pan-HDACi MS-275 (**Figure 4A**). M-100 was highly specific at  
314 physiological concentrations and only a very weak histone H3 acetylation was detected at  
315 unphysiologically high concentrations (**Figure 4B**). Importantly, this limit is above most  
316 obtained IC<sub>50</sub> values for M-100 in B-cell lymphoma cells (**Figure 2B, 3D**).

317 To further validate our findings, we generated Ramos HDAC6 knock-out (KO) cells using  
318 targeted CRISPR/Cas9 technology. HDAC6 KO cells were characterized by permanent  
319 hyperacetylation of Tubulin (**Figure 4C**). Importantly, KO of HDAC6 mimics to some extent  
320 the treatment with M-100 as Ramos HDAC6 KO cells showed reduced proliferation and  
321 increased apoptosis compared to cells containing HDAC6 (**Figure 4D, E**). As expected,  
322 Ramos HDAC6 KO cells were rather insensitive to M-100 treatment (IC<sub>50</sub>=9.47 μM) as  
323 measured with MTT assay (**Figure 4F**). However, KO of HDAC6 barely altered the  
324 response of Ramos cells towards ACY-1215, revealing a very narrow window of specific  
325 targeting (**Figure 4F**). This underlines that M-100 has improved specificity for HDAC6 and  
326 preferentially induces acetylation of Tubulin but not off-targets such as histone H3.

### 327 **HDAC6 inhibition induces MYC degradation.**

328 MYC-dependent lymphoma cells respond to M-100 treatment with a strong induction of  
329 apoptosis. To shed further light on the underlying cellular mechanism, we treated Ramos  
330 cells with different concentrations of M-100 for 6 h and 24 h. MYC protein levels were  
331 already reduced 6 h after treatment with 2 μM and 4 μM M-100 (**Figure 5A**). Consistent  
332 with our previous findings, we also detected PARP-1 cleavage 24 h after treatment with  
333 M-100 (**Figure 5A**). Although BCL2 levels decreased after HDAC6 inhibition, we obtained  
334 opposing results for gene expression of the *BCL2* gene (**Figure 5B**). Expression of pro-  
335 apoptotic BIM was significantly upregulated, while *MYC* transcription again remained  
336 unaltered upon M-100 treatment (**Figure 5B**).

337 As we could observe apoptosis in *MYC*-dependent lymphoma cell lines upon M-100  
338 treatment, we also tested Raji, BL-30, OCI-Ly3 and SUDHL-6 cells for their MYC levels  
339 after M-100 treatment. All tested BL and DLBCL cell lines showed a substantial reduction  
340 of MYC protein levels after 6 h (**Figure 5C**), pointing towards a general mechanism of  
341 MYC degradation after HDAC6 inhibition. To assess if MYC degradation is regulated by  
342 ubiquitin-mediated proteolysis upon HDAC6 inhibition, we performed combinatorial

343 treatments with M-100 and the proteasome inhibitor MG132. MYC degradation was  
344 efficiently blocked when proteasomes were not functioning (**Figure 5D**). These results  
345 indicate that HDAC6 inhibition by M-100 specifically provokes ubiquitination of MYC and  
346 subsequent proteasomal degradation.

### 347 **MYC degradation is associated with changes in the interactome of Ac-Tubulin.**

348 HDAC6 inhibition induces proteasomal degradation of MYC. To test whether this effect is  
349 mediated by a direct interaction, we performed immunoprecipitations (IPs) and were able  
350 to pull-down endogenous HDAC6/MYC complexes in Ramos cells (**Figure 6A**). However,  
351 HDAC6 is localized exclusively in the cytoplasm, whereas MYC is found in the cytoplasm  
352 and predominantly in the nucleus (**Figure 6B**). Thus, we analyzed the impact of MYC  
353 localization for its degradation. For this purpose, we transfected NIH-3T3 cells to express  
354 GFP-MYC and treated these cells with Importazole or Leptomycin B to block nuclear  
355 import or export, respectively (**Figure 6C**). Afterward, cells were treated with CHX to  
356 induce cell-intrinsic degradation and levels of MYC-GFP were tracked via flow cytometry.  
357 Interestingly, the degradation of MYC-GFP was significantly accelerated in the cytoplasm  
358 but not nucleus (**Figure 6C**).

359 It has been previously described that MYC is associated with Tubulin (33). As we showed  
360 that Tubulin is strongly acetylated in lymphoma cells after M-100 treatment, we wanted to  
361 detect the cytoplasmic localization of MYC in response to M-100. We detected a close  
362 localization between MYC and Ac-Tubulin in Ramos cells using proximity ligation assay  
363 (PLA), even under physiological conditions (**Figure 6D**). PLA signals disappeared after  
364 M-100 treatment, although MYC and Ac-Tubulin were still present (**Figure 6D**).

365 As Tubulin is an essential substrate of HDAC6, a detailed interactome analysis of heavily  
366 acetylated Tubulin was performed in MYC-dependent blood cancer cells via mass  
367 spectrometry. Bound proteins were identified which showed either increased abundance  
368 (>2-fold) or new binding to Ac-Tubulin after M-100 treatment compared to control. From  
369 2309 identified proteins, treatment with M-100 led to enhanced binding of 357 proteins  
370 and new binding of 323 proteins to heavily acetylated Tubulin (**Figure 6E**). A functional  
371 annotation of the altered Tubulin interactome after M-100 treatment using the DAVID tool  
372 confirmed significant changes in proteins related to acetylation, nucleotide-binding,

373 protein transport, and ubiquitin conjugation (**Figure 6E**). Overrepresented protein groups  
374 that attached to heavily acetylated Tubulin were HSPs from the chaperone type, including  
375 DNAJ proteins (**Figure 6F**). For example, the chaperone member DNAJA3 which is  
376 important for proteasomal degradation and was shown to interact with MYC in high-  
377 throughput studies (34). Taken together, we demonstrated that MYC degradation is  
378 associated with changes in the interactome of Ac-Tubulin after HDAC6 inhibition.

### 379 **The chaperone DNAJA3 is recruited to Ac-Tubulin and induces MYC degradation.**

380 We verified the highly increased binding of DNAJA3 to Tubulin after M-100 treatment  
381 using overexpression studies (**Figure 7A**). In addition, we demonstrated the presence of  
382 Ac-Tubulin and DNAJA3 complexes endogenously in Ramos cells (**Figure 7B**). Of note,  
383 the chaperone DNAJA3 has large and small isoforms that are generated from the  
384 cleavage of precursor proteins (35,36), which we could also detect in our experiments  
385 (**Figure 7A, B**). We used PLA to uncover a close cellular localization of DNAJA3 with  
386 MYC in BL cells (**Figure 7C**). However, HDAC6 inhibition rapidly reduced the number of  
387 detected PLA foci per cell. These data suggest that heavily acetylated Tubulin acts as an  
388 interaction hub for MYC and DNAJA3 in the cytoplasm where degradation of MYC occurs.

389 As DNAJ proteins are involved in ATP-dependent protein folding and degradation (37),  
390 we investigated potential effects of DNAJA3 on MYC stability. Surprisingly, both DNAJA3  
391 isoforms were able to significantly decrease high MYC levels in overexpression studies  
392 (**Figure 7D**). Finally, we retrospectively investigated the bone marrow of E $\mu$ -Myc mice  
393 treated once by i.p. with 30 mg/kg M-100. Interestingly, we could detect elevated levels of  
394 DNAJA3 after M-100 treatment (**Figure 7E**) which could explain the observed absence of  
395 lymphomagenesis in *Myc*-driven mice. Taken together, our results indicate that HDAC6  
396 inhibition (1) results in a remodeling of the Tubulin interactome driven by hyperacetylation,  
397 (2) recruitment of chaperones including DNAJA3 to Ac-Tubulin, and (3) degradation of  
398 oncogenic MYC in *MYC*-overexpressing cells (**Figure 7F**). Importantly, our results could  
399 be of beneficial use for the therapy of human *MYC*-dependent lymphoid malignancies.

400

## 401 Discussion

402 The role of HDAC6 inhibitors in cancer therapy is still a matter of debate. A recent study  
403 showed that many cancer models are tolerant to HDAC6 inhibitor treatment (38).  
404 However, a deeper look into the different tumor models in light of newly emerging  
405 inhibitors might be helpful in developing new strategies for cancer treatment. We  
406 demonstrate that *MYC*-dependent lymphomas are extremely sensitive to the highly-  
407 specific HDAC6 inhibitor M-100. HDAC6 was shown to preferentially target Tubulin dimers  
408 but also deacetylate microtubules at K40 (39). While Ac-Tubulin dimers showed reduced  
409 nucleation frequency, acetylated microtubules showed accelerated shrinkage (40). *MYC*  
410 is known to associate with microtubules that facilitate nuclear import of *MYC* by unknown  
411 mechanisms (33). Thus, microtubule acetylation might prevent transport of *MYC* to the  
412 nucleus and prolong cytoplasmic retention. In fact, we show that cytoplasmic localization  
413 of *MYC* promotes its proteasomal degradation.

414 The turn-over of *MYC* is depending on two opposing phosphorylation events of *MYC* at  
415 T58 and S62 which determines protein stability as a phosphodegron (41,42). Our data  
416 show that Raji cells which are mutated at T58 were the least sensitive to M-100. Thus,  
417 efficient *MYC* degradation after HDAC6 inhibition might require wild-type T58 in *MYC*.  
418 Interestingly, phosphorylation of *MYC* impeded its interaction with Tubulin, resulting in  
419 increased *MYC* stability in BL (41). Vice versa, our data indicate that the association of  
420 *MYC* with Ac-Tubulin decreases *MYC* stability. Moreover, our interactome data suggest  
421 that hyperacetylation of Tubulin leads to recruitment of proteins related to the functional  
422 annotation terms "Phosphoprotein", "Nucleotide-binding", and "Ubiquitin-like conjugation"  
423 which may influence the phosphodegron of *MYC*.

424 We did not discover effects of M-100 on direct acetylation sites of *MYC* in our experiments  
425 (data not shown). This observation is in contrast to the effects of the pan-HDACi MS-275  
426 in hematological malignancies, where direct acetylation of *MYC* regulated target gene  
427 transcription (10). However, we were able to exclude direct transcriptional changes on  
428 *MYC* by M-100 in murine and human cells. This is underlined by several studies showing  
429 that M-100 treatment does not result in altered histone acetylation (43,25,44).



430 In our work we reveal that M-100 treatment of B-cell lymphoma cells induces proteasomal  
431 degradation of MYC. Besides, we prove that MYC forms a complex with the heat-shock  
432 protein DNAJA3 and hyperacetylation of Tubulin strongly recruits DNAJA3. Studies  
433 showed that DNAJA3 associates directly with the E3 ligase HUWE1 and von Hippel-  
434 Lindau tumor suppressor (45). HUWE1 is a major E3 ligase for MYC (46), which would  
435 connect DNAJA3 to the turnover of MYC. Besides, DNAJA3 was shown to mediate  
436 ubiquitination and degradation of oncogenic epidermal growth factor receptor (35).  
437 Previous strategies to inhibit HDAC6 using ACY-1215 in B-cell lymphoma resulted in an  
438 activation of the unfolded protein response by increasing quantity and acetylation of HSPs  
439 (14). Similarly, we observe increased levels of the HSP DNAJA3 in the bone marrow of  
440 mice treated with M-100. In addition, our interactome analysis suggest that HDAC6  
441 inhibition leads to the recruitment of several DNAJ proteins to Ac-Tubulin, making it  
442 possible that other HSPs play a role in the observed MYC instability as well.

443 The occupation of MYC on distinct sets of target genes was described to depend on the  
444 amount of MYC molecules (5), which might explain the adverse Bcl-2 response of murine  
445 healthy and *Myc*-transformed B-cells to M-100 in our experiments. E $\mu$ -Myc lymphoma  
446 cells treated with M-100 de-repressed *Bbc3* as well as *Pmaip1* and repressed *Bcl2*  
447 expression. Importantly, direct transcriptional regulation of *Bbc3* and *Pmaip1* by Myc was  
448 shown to be possible (47,48), and deficiency of *Bbc3* and *Pmaip1* accelerated  
449 lymphomagenesis in E $\mu$ -Myc mice (49). Thus, permanent upregulation of *Bbc3* and  
450 *Pmaip1* caused by HDAC6 inhibition might be an explanation for the observed survival  
451 prolongation of E $\mu$ -Myc mice upon long-term M-100 treatment.

452 Taken together, M-100 has potent anti-tumoral activity by targeting the stability of MYC.  
453 A fully water-soluble derivative of M-100 exists, which extends possible *in vivo* use (24).  
454 However, drug resistance to HDAC6 inhibition was recently described (50), and future  
455 directions should aim for rational drug combinations to treat distinct malignancies.

456 **Acknowledgments**

457 We thank Carmen Mertens for technical assistance as well as Dr. Karl-Gunther Glowalla,  
458 Petra Grübner and Andreas Köber for animal care. We are grateful to Katrin Schubert for  
459 assistance with cell sorting (FLI Jena) and Dr. David Corujo for bioinformatic support. We  
460 also want to thank Dr. Marcus Buschbeck for giving feedback on the manuscript. Prof. Dr.  
461 Ralf Küppers kindly provided lymphoma cell lines.

462 **Authorship Contributions**

463 Conception and design, C.K.; Development of methodology, R.W., A.-S.M., M.B., M.E.H.,  
464 S.P., and F.H.; Acquisition of data, R.W., A.-S.M., M.K., M.B., K.L., L.H., A.-M.S., M.E.H.,  
465 S.P., and F.H.; Analysis and interpretation of data, R.W., A.-S.M., M.E.H., and C. K.;  
466 Writing, review, and/or revision of the manuscript, R.W., A.-S.M., and C. K.;  
467 Administrative, technical, or material support, O.H.K., P.B., and S.M.; Study supervision,  
468 P.B., T.M, O.H.K., and C. K.

469

## 470 References

- 471 1. Basso K, Dalla-Favera R. Germinal centres and B cell lymphomagenesis. *Nat Rev*  
472 *Immunol.* Nature Publishing Group; 2015;15:172–84.
- 473 2. Swerdlow SH, Campo E, Pileri SA, Lee Harris N, Stein H, Siebert R, et al. The  
474 2016 revision of the World Health Organization classification of lymphoid  
475 neoplasms. *Blood.* 2016;127:2375–90.
- 476 3. Gupta M, Maurer MJ, Wellik LE, Law ME, Han JJ, Ozsan N, et al. Expression of  
477 Myc, but not pSTAT3, is an adverse prognostic factor for diffuse large B-cell  
478 lymphoma treated with epratuzumab/R-CHOP. *Blood.* 2012;120:4400–6.
- 479 4. Aukema SM, Kreuz M, Kohler CW, Rosolowski M, Hasenclever D, Hummel M, et  
480 al. Biological characterization of adult MYC-translocation-positive mature B-cell  
481 lymphomas other than molecular Burkitt lymphoma. *Haematologica.* 2014;99:726–  
482 35.
- 483 5. Lorenzin F, Benary U, Baluapuri A, Walz S, Jung LA, von Eyss B, et al. Different  
484 promoter affinities account for specificity in MYC-dependent gene regulation. *Elife.*  
485 2016;5:1–35.
- 486 6. Sabò A, Kress TR, Pelizzola M, De Pretis S, Gorski MM, Tesi A, et al. Selective  
487 transcriptional regulation by Myc in cellular growth control and lymphomagenesis.  
488 *Nature.* 2014;511:488–92.
- 489 7. Koh CM, Bezzi M, Low DHP, Ang WX, Teo SX, Gay FPH, et al. MYC regulates  
490 the core pre-mRNA splicing machinery as an essential step in lymphomagenesis.  
491 *Nature.* 2015;523:96–100.
- 492 8. Poole CJ, van Riggelen J. MYC—master regulator of the cancer epigenome and  
493 transcriptome. *Genes (Basel).* 2017.
- 494 9. Stubbs MC, Kim W, Bariteau M, Davis T, Vempati S, Minehart J, et al. Selective  
495 inhibition of HDAC1 and HDAC2 as a potential therapeutic option for B-ALL. *Clin*  
496 *Cancer Res.* 2015;21:2348–58.
- 497 10. Nebbioso A, Carafa V, Conte M, Tambaro FP, Ciro A, Martens J, et al. C-Myc  
498 modulation and acetylation is a key HDAC inhibitor target in cancer. *Clin Cancer*  
499 *Res.* 2016;23:2542–55.
- 500 11. Shin DY, Kim A, Kang HJ, Park S, Kim DW, Lee SS. Histone deacetylase inhibitor  
501 romidepsin induces efficient tumor cell lysis via selective down-regulation of LMP1  
502 and c-myc expression in EBV-positive diffuse large B-cell lymphoma. *Cancer Lett.*  
503 Elsevier Ireland Ltd; 2015;364:89–97.
- 504 12. New M, Olzscha H, La Thangue NB. HDAC inhibitor-based therapies: Can we  
505 interpret the code? *Mol Oncol.* 2012;6:637–56.
- 506 13. Bereshchenko OR, Gu W, Dalla-Favera R. Acetylation inactivates the  
507 transcriptional repressor BCL6. *Nat Genet.* 2002;32:606–13.
- 508 14. Amengual JE, Johannet P, Lombardo M, Zullo K, Hoehn D, Bhagat G, et al. Dual

- 509 targeting of protein degradation pathways with the selective HDAC6 inhibitor ACY-  
510 1215 and bortezomib is synergistic in lymphoma. *Clin Cancer Res.* 2015;21:4663–  
511 75.
- 512 15. Salghetti SE, Kim SY, Tansey WP. Destruction of Myc by ubiquitin-mediated  
513 proteolysis: Cancer-associated and transforming mutations stabilize Myc. *EMBO*  
514 *J.* 1999;18:717–26.
- 515 16. Ross J, Miron CE, Plescia J, Laplante P, McBride K, Moitessier N, et al. Targeting  
516 MYC: From understanding its biology to drug discovery. *Eur J Med Chem.*  
517 2021;213.
- 518 17. Winkler R, Kosan C. HDAC/HAT Function Assessment and Inhibitor Development.  
519 *Methods Mol Biol.* 2017;1510:93–101.
- 520 18. Barretina J, Caponigro G, Stransky N, Venkatesan K, Margolin AA, Kim S, et al.  
521 The Cancer Cell Line Encyclopedia enables predictive modelling of anticancer  
522 drug sensitivity. *Nature.* 2012;483:603–7.
- 523 19. Tate JG, Bamford S, Jubb HC, Sondka Z, Beare DM, Bindal N, et al. COSMIC:  
524 The Catalogue Of Somatic Mutations In Cancer. *Nucleic Acids Res. Oxford*  
525 *University Press;* 2019;47:D941–7.
- 526 20. Rempel RE, Jiang X, Fullerton P, Tan TZ, Ye J, Lau JA, et al. Utilization of the E -  
527 Myc Mouse to Model Heterogeneity of Therapeutic Response. *Mol Cancer Ther.*  
528 2014;13:3219–29.
- 529 21. Ross J, Rashkovan M, Fraszczak J, Joly-Beauparlant C, Vadnais C, Winkler RR,  
530 et al. Deletion of the MIZ-1 POZ domain increases efficacy of cytarabine treatment  
531 in T- And B-ALL/lymphoma mouse models. *Cancer Res.* 2019;79:4184–95.
- 532 22. Schuster C, Berger A, Hoelzl MA, Putz EM, Frenzel A, Simma O, et al. The  
533 cooperating mutation or “second hit” determines the immunologic visibility toward  
534 MYC-induced murine lymphomas. *Blood.* 2011;118:4635–45.
- 535 23. Nakamura M, Kondo S, Sugai M, Nazarea M, Imamura S, Honjo T. High  
536 frequency class switching of an IgM+ B lymphoma clone CH12F3 to IgA+ cells. *Int*  
537 *Immunol.* 1996;8:193–201.
- 538 24. Leonhardt M, Sellmer A, Krämer OH, Dove S, Elz S, Kraus B, et al. Design and  
539 biological evaluation of tetrahydro- $\beta$ -carboline derivatives as highly potent histone  
540 deacetylase 6 (HDAC6) inhibitors. *Eur J Med Chem.* 2018;152:329–57.
- 541 25. Sellmer A, Stangl H, Beyer M, Grünstein E, Leonhardt M, Pongratz H, et al.  
542 Marbostat-100 Defines a New Class of Potent and Selective Antiinflammatory and  
543 Antirheumatic Histone Deacetylase 6 Inhibitors. *J Med Chem.* 2018;61:3454–77.
- 544 26. Karpova MB, Schoumans J, Ernberg J, Henter JI, Nordenskjöld M, Fadeel B. Raji  
545 revisited: Cytogenetics of the original Burkitt’s lymphoma cell line. *Leukemia.*  
546 2005;19:159–61.
- 547 27. Kleo K, Dimitrova L, Oker E, Tomaszewski N, Berg E, Taruttis F, et al.  
548 Identification of ADGRE5 as discriminating MYC target between Burkitt lymphoma

- 549 and diffuse large B-cell lymphoma. *BMC Cancer*. *BMC Cancer*; 2019;19:1–11.
- 550 28. Deng W, Clipson A, Liu H, Huang Y, Dobson R, Wang M, et al. Variable  
551 Responses of MYC Translocation Positive Lymphoma Cell Lines To Different  
552 Combinations of Novel Agents: Impact of BCL2 Family Protein Expression. *Transl*  
553 *Oncol*. Elsevier Inc.; 2018;11:1147–54.
- 554 29. Bemark M, Neuberger MS. The c-MYC allele that is translocated into the IgH locus  
555 undergoes constitutive hypermutation in a Burkitt's lymphoma line. *Oncogene*.  
556 2000;19:3404–10.
- 557 30. Philip I, Philip T, Favrot M, Vuillaume M, Fontaniere B, Chamard D, et al.  
558 Establishment of lymphomatous cell lines from bone marrow samples from  
559 patients with burkitt's lymphoma. *J Natl Cancer Inst*. 1984;73:835–40.
- 560 31. Trabucco SE, Gerstein RM, Evens AM, Bradner JE, Shultz LD, Greiner DL, et al.  
561 Inhibition of bromodomain proteins for the treatment of human diffuse large B-cell  
562 lymphoma. *Clin Cancer Res*. 2015;21:113–22.
- 563 32. Amengual JE, Lue JK, Ma H, Lichtenstein R, Shah B, Cremers S, et al. First-in-  
564 Class Selective HDAC6 Inhibitor (ACY-1215) Has a Highly Favorable Safety  
565 Profile in Patients with Relapsed and Refractory Lymphoma. *Oncologist*.  
566 2021;26:184-e366.
- 567 33. Alexandrova N, Niklinski J, Bliskovsky V, Otterson GA, Blake M, Kaye FJ, et al.  
568 The N-terminal domain of c-Myc associates with alpha-tubulin and microtubules in  
569 vivo and in vitro. *Mol Cell Biol*. 1995;15:5188–95.
- 570 34. Heidelberger JB, Voigt A, Borisova ME, Petrosino G, Ruf S, Wagner SA, et al.  
571 Proteomic profiling of VCP substrates links VCP to K6-linked ubiquitylation and c-  
572 Myc function. *EMBO Rep*. 2018;19:1–20.
- 573 35. Chen CY, Jan CI, Lo JF, Yang SC, Chang YL, Pan SH, et al. Tid1-L inhibits EGFR  
574 signaling in lung adenocarcinoma by enhancing EGFR ubiquitinylation and  
575 degradation. *Cancer Res*. 2013;73:4009–19.
- 576 36. Lu B, Garrido N, Spelbrink JN, Suzuki CK. Tid1 isoforms are mitochondrial DnaJ-  
577 like chaperones with unique carboxyl termini that determine cytosolic fate. *J Biol*  
578 *Chem*. 2006;281:13150–8.
- 579 37. Sterrenberg JN, Blatch GL, Edkins AL. Human DNAJ in cancer and stem cells.  
580 *Cancer Lett*. Elsevier Ireland Ltd; 2011;312:129–42.
- 581 38. Depetter Y, Geurs S, De Vreese R, Goethals S, Vandoorn E, Laevens A, et al.  
582 Selective pharmacological inhibitors of HDAC6 reveal biochemical activity but  
583 functional tolerance in cancer models. *Int J Cancer*. 2019;145:735–47.
- 584 39. Miyake Y, Keusch JJ, Wang L, Saito M, Hess D, Wang X, et al. Structural insights  
585 into HDAC6 tubulin deacetylation and its selective inhibition. *Nat Chem Biol*.  
586 Nature Publishing Group; 2016;12:748–54.
- 587 40. Portran D, Schaedel L, Xu Z, Théry M, Nachury M V. Tubulin acetylation protects  
588 long-lived microtubules against mechanical ageing. *Nat Cell Biol*. 2017;19:391–8.

- 589 41. Niklinski J, Claassen G, Meyers C, Gregory M a, Allegra CJ, Kaye FJ, et al.  
590 Disruption of Myc-tubulin interaction by hyperphosphorylation of c-Myc during  
591 mitosis or by constitutive hyperphosphorylation of mutant c-Myc in Burkitt's  
592 lymphoma. *Mol Cell Biol.* 2000;20:5276–84.
- 593 42. Popov N, Schüle C, Jaenicke LA, Eilers M. Ubiquitylation of the amino terminus  
594 of Myc by SCF $\beta$ -TrCP antagonizes SCFFbw7-mediated turnover. *Nat Cell Biol.*  
595 2010;12:973–81.
- 596 43. Schäfer C, Göder A, Beyer M, Kiweler N, Mahendrarajah N, Rauch A, et al. Class  
597 I histone deacetylases regulate p53/NF- $\kappa$ B crosstalk in cancer cells. *Cell Signal.*  
598 Elsevier Inc.; 2017;29:218–25.
- 599 44. Stojanovic N, Hassan Z, Wirth M, Wenzel P, Beyer M, Schäfer C, et al. HDAC1  
600 and HDAC2 integrate the expression of p53 mutants in pancreatic cancer.  
601 *Oncogene.* Nature Publishing Group; 2017;36:1804–15.
- 602 45. Thompson JW, Nagel J, Hoving S, Gerrits B, Bauer A, Thomas JR, et al.  
603 Quantitative Lys- $\epsilon$ -Gly-Gly (diGly) proteomics coupled with inducible RNAi reveals  
604 ubiquitin-mediated proteolysis of DNA damage-inducible transcript 4 (DDIT4) by  
605 the E3 Ligase HUWE1. *J Biol Chem.* 2014;289:28942–55.
- 606 46. Inoue S, Hao Z, Elia AJ, Cescon D, Zhou L, Silvester J, et al. Mule/Huwe1/Arf-BP1  
607 suppresses Ras-driven tumorigenesis by preventing c-Myc/Miz1-mediated down-  
608 regulation of p21 and p15. *Genes Dev.* 2013;27:1101–14.
- 609 47. Wirth M, Stojanovic N, Christian J, Paul MC, Stauber RH, Schmid RM, et al. MYC  
610 and EGR1 synergize to trigger tumor cell death by controlling NOXA and BIM  
611 transcription upon treatment with the proteasome inhibitor bortezomib. *Nucleic  
612 Acids Res.* 2014;42:10433–47.
- 613 48. Maclean KH, Keller UB, Rodriguez-Galindo C, Nilsson JA, Cleveland JL. c-Myc  
614 Augments Gamma Irradiation-Induced Apoptosis by Suppressing Bcl-XL. *Mol Cell  
615 Biol.* 2003;23:7256–70.
- 616 49. Michalak EM, Jansen ES, Hoppo L, Cragg MS, Tai L, Smyth GK, et al. Puma and  
617 to a lesser extent Noxa are suppressors of Myc-induced lymphomagenesis. *Cell  
618 Death Differ.* Nature Publishing Group; 2009;16:684–96.
- 619 50. Amengual JE, Prabhu SA, Lombardo M, Zullo K, Johannet PM, Gonzalez Y, et al.  
620 Mechanisms of acquired drug resistance to the HDAC6 selective inhibitor  
621 ricolinostat reveals rational drug-drug combination with ibrutinib. *Clin Cancer Res.*  
622 2017;23:3084–96.

623

624 **Figures and figure legends**

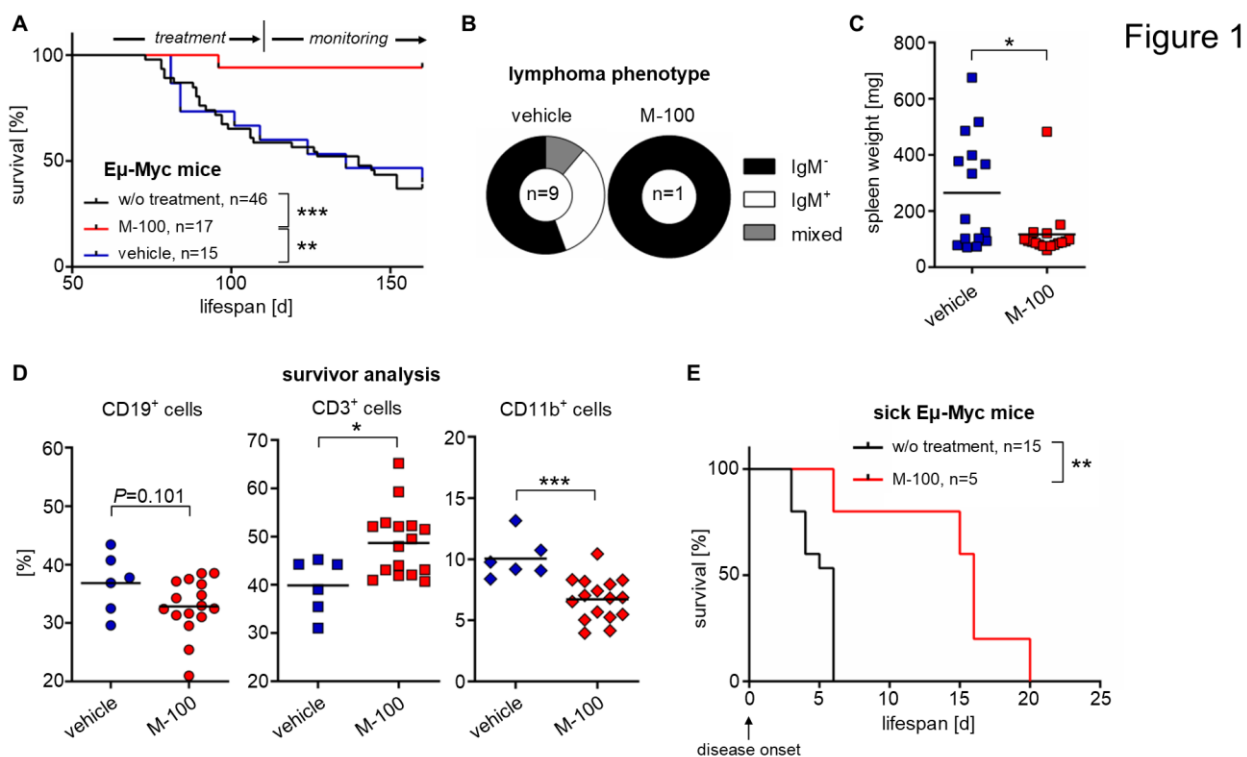

625 **Figure 1: HDAC6 inhibition increases survival of lymphoma-prone Eμ-Myc mice.**

626 **(A)** Survival curves of Eμ-Myc mice treated with 30 mg/kg M-100 or vehicle. Treatment  
627 started at age 70 d with two injections per week for six weeks. Afterward, mice were  
628 monitored for six weeks for signs of lymphoma development. The median survival of the  
629 vehicle cohort was 136 d, and the median survival of the M-100 cohort could not be  
630 determined for this experiment. In comparison, the survival curve of untreated Eμ-Myc  
631 mice (median 140 d) is shown. Log-Rank-test. **(B)** Lymphoma phenotypes were analyzed  
632 of diseased Eμ-Myc mice via flow cytometry using IgM surface expression. **(C)** Spleen  
633 weights were compared between all monitored mice reaching endpoint (death or end of  
634 the experiment). Each dot represents one mouse. Unpaired Student's t-test. **(D)** Flow  
635 cytometry analysis was performed of immune cell populations in spleens of survivors.  
636 Each dot represents one mouse. Unpaired Student's t-test. Bars depict mean. **(E)** Survival  
637 curves of Eμ-Myc mice suffering from an acute disease treated with M-100 (median 16 d)  
638 or left untreated (median 6 d). Mice were treated every 72 h with M-100 (30 mg/kg) starting  
639 when disease onset was present. Treatment continued until endpoint criteria were  
640 reached. Log-Rank-test. \* $P < 0.05$ , \*\* $P < 0.01$ , \*\*\* $P < 0.001$ .

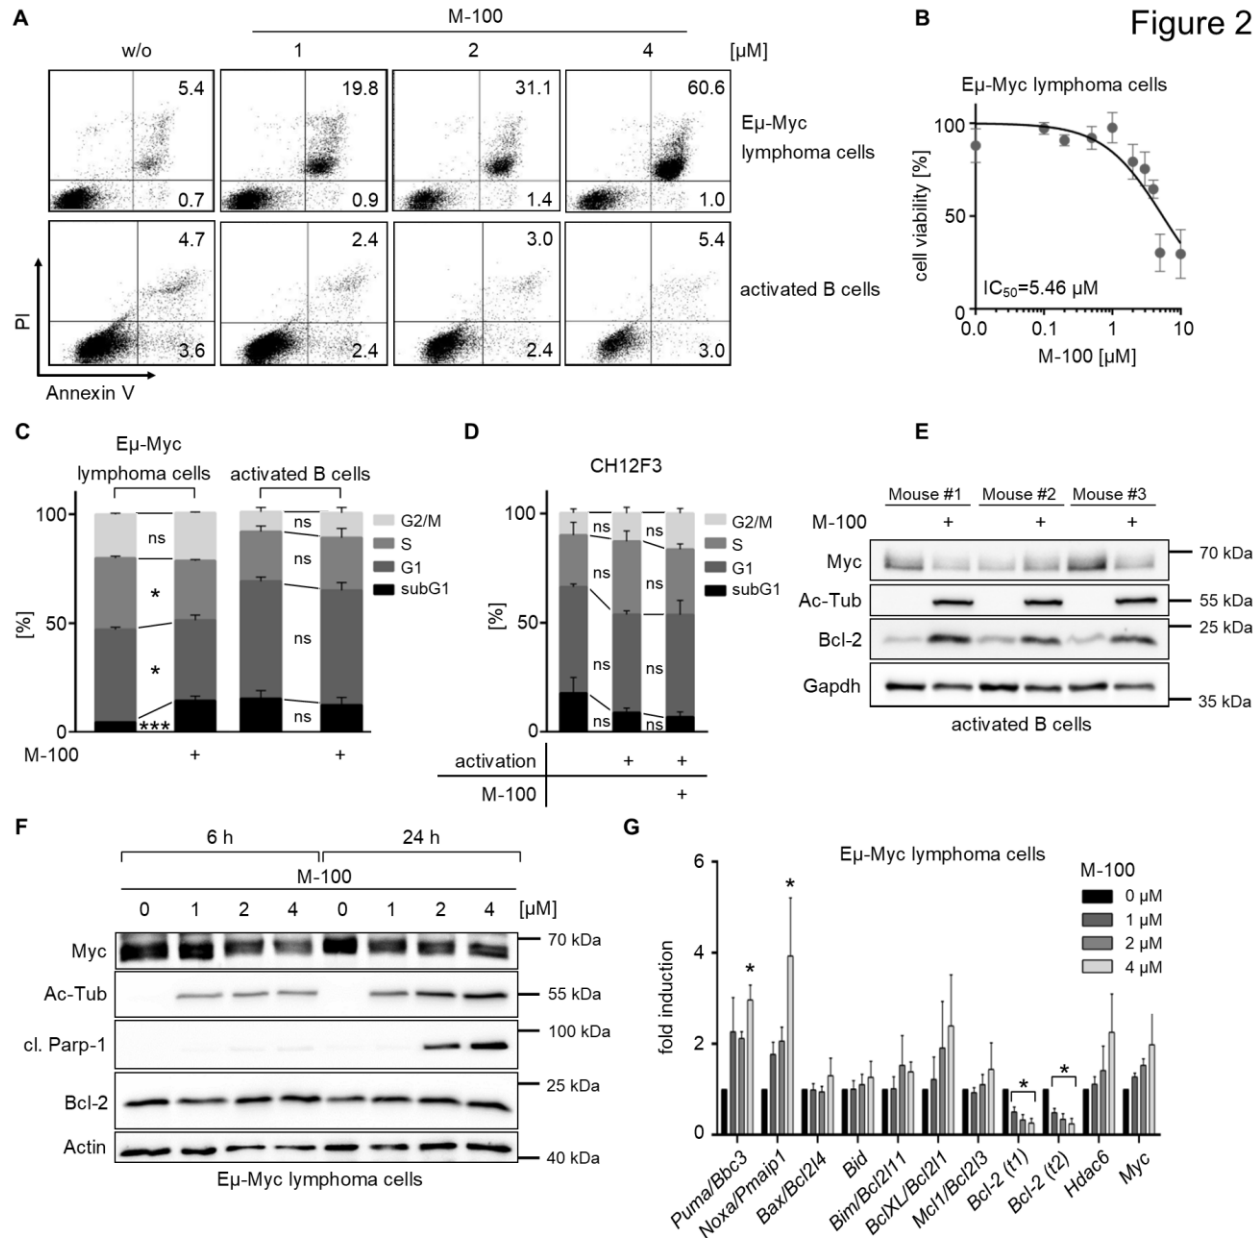

641 **Figure 2: M-100 specifically induces apoptosis in lymphoma B-cells.**

642 **(A)** Apoptosis was analyzed in Eμ-Myc lymphoma cells and activated (10 μg LPS/ml)  
 643 primary wild-type mouse B-cells treated for 72 h with 1 μM, 2 μM or 4 μM M-100 using  
 644 Annexin V and PI staining. **(B)** Cell viability was determined of Eμ-Myc lymphoma cells  
 645 treated for 48 h with increasing concentrations of M-100 using MTT assay. Non-linear  
 646 regression (inhibitor vs. normalized response) was inserted and IC<sub>50</sub> was calculated. **(C)**  
 647 Cell cycle analysis of Eμ-Myc lymphoma cells and activated B-cells treated for 72 h with  
 648 4 μM M-100 was quantified. Two-Way ANOVA (Sidak's posthoc). **(D)** Cell cycle analysis



649 was performed of CH12F3 cells treated for 48 h with 2  $\mu$ M M-100. Activation was  
650 performed using 1  $\mu$ g/ml CD40L, 5 ng/ml IL-4, and 1 ng/ml TGF- $\beta$  and added 2 h after  
651 M-100 treatment. CH12F3 cells harbor no *Myc* translocation. **(E)** Western Blot analysis  
652 was performed of activated wild-type B-cells from three individual mice stimulated with  
653 10  $\mu$ g/ml LPS for 18 h and 4  $\mu$ M M-100 for additional 24 h. Gapdh was used as a loading  
654 control. Ac-Tub - acetylated Tubulin. **(F)** Western Blot analysis was performed of E $\mu$ -Myc  
655 lymphoma cells treated for 6 h or 24 h with 1  $\mu$ M, 2  $\mu$ M or 4  $\mu$ M M-100. Actin was used as  
656 a loading control. cl. - cleaved. **(G)** Gene expression was analyzed of E $\mu$ -Myc lymphoma  
657 cells treated for 24 h with 1  $\mu$ M, 2  $\mu$ M or 4  $\mu$ M M-100 using quantitative real-time PCR  
658 analysis. Fold inductions were calculated using the comparative  $\Delta\Delta$ CT method based on  
659 *Actin* expression. Two different transcripts, t1 and t2, were analyzed for *Bcl2*. One-Way  
660 ANOVA (Dunnett's posthoc). Data in (A) - (D), (F), and (G) are representative of at least  
661 three independent experiments. All data represent mean + SEM, if applicable. \* $P$ <0.05,  
662 \*\*\* $P$ <0.001, ns - not significant.

663

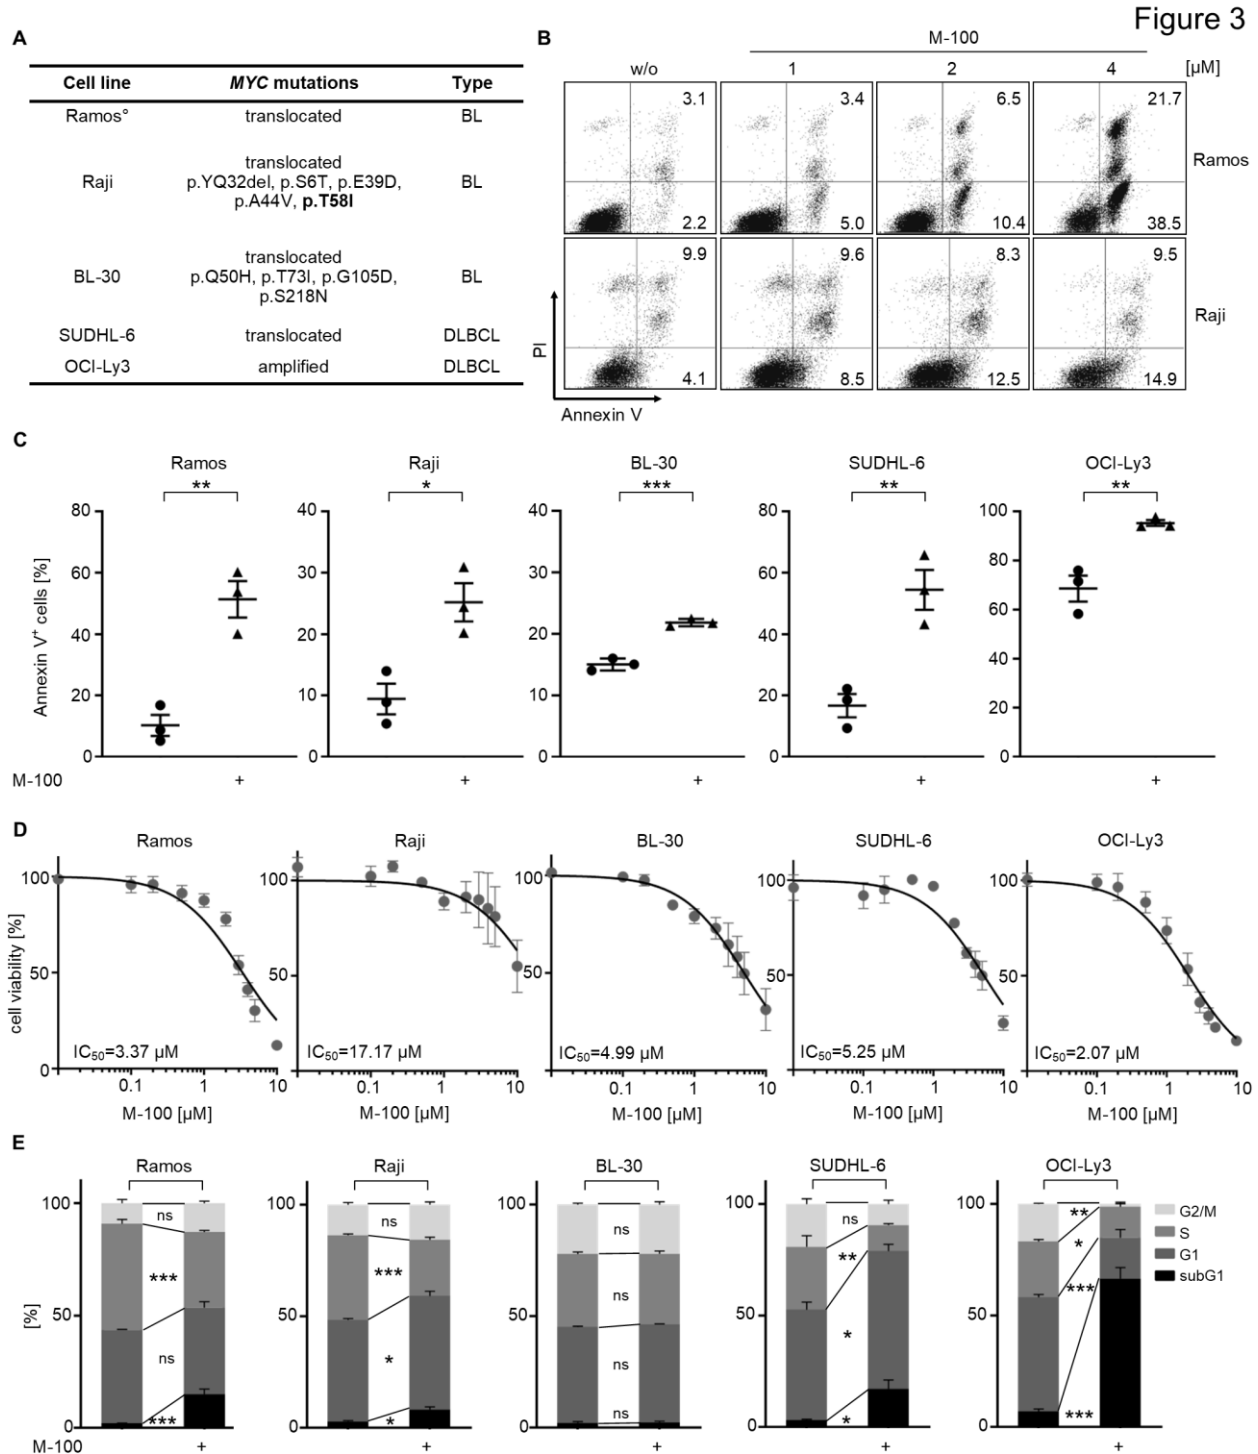

664

665 **Figure 3: HDAC6 inhibition leads to apoptosis in human B-cell lymphoma cell lines.**

666 **(A)** Table summarizing *MYC* mutations in the used cell lines from the CCLE and COSMIC

667 databases. <sup>°</sup>Sequencing data were only available for subclone Ramos2G64C10. **(B)**

668 Ramos and Raji cells were treated for 72 h with 1  $\mu$ M, 2  $\mu$ M or 4  $\mu$ M M-100 and apoptosis

669 was analyzed by flow cytometry using Annexin V and PI staining. **(C)** The amount of  
670 Annexin V<sup>+</sup> cells was analyzed for the shown cell lines after treatment with 4 μM M-100  
671 for 72 h. Unpaired Student's t-test. **(D)** Cells were treated for 48 h with increasing  
672 concentrations of M-100, and cell viability was determined using MTT assay. Non-linear  
673 regression (inhibitor vs. normalized response) was inserted and IC<sub>50</sub> was calculated. **(E)**  
674 Cell cycle analysis was performed of cells treated as in (D). Two-Way ANOVA (Sidak's  
675 posthoc). Data in (B) - (E) are representative of at least three independent experiments.  
676 All data represent mean + SEM, if applicable. \**P*<0.05, \*\**P* <0.01, \*\*\**P*<0.001, ns - not  
677 significant.

678

679

Figure 4

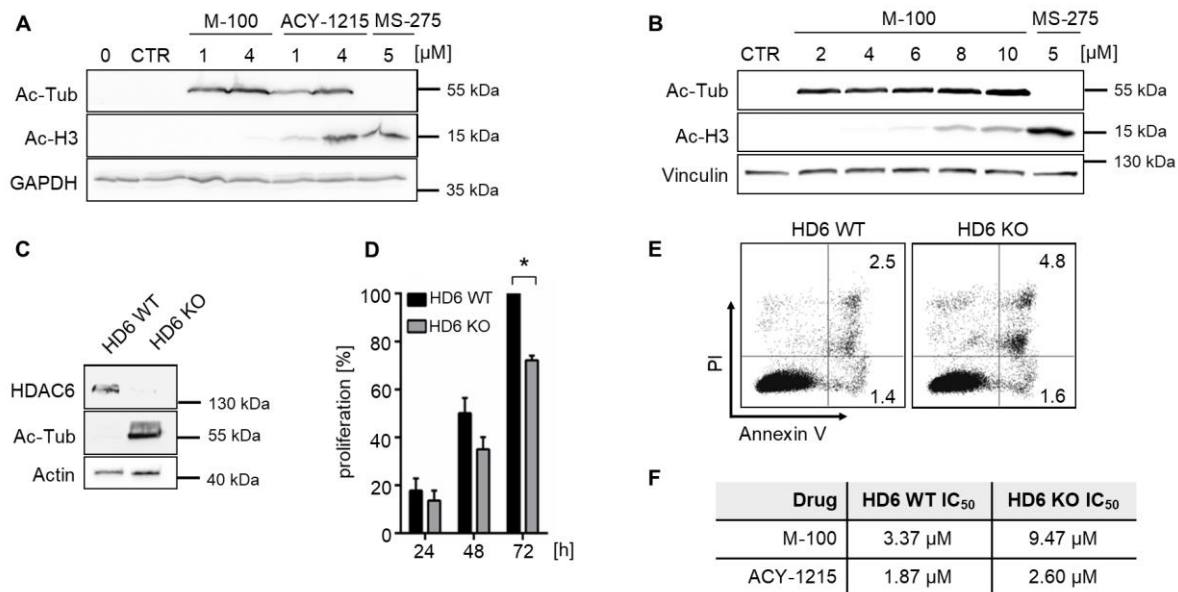

680 **Figure 4: M-100 is a highly-specific HDAC6 inhibitor.**

681 **(A)** Off-target effects were assessed for M-100 and ACY-1215 by comparing acetylated  
682 Tubulin (Ac-Tub) and acetylated histone 3 (Ac-H3) signals by Western blot. Treatment  
683 with pan-HDACi MS-275 serves as a control for Ac-H3 signals. All treatments were  
684 performed for 24 h. GAPDH was used as a loading control. **(B)** Different concentrations of  
685 M-100 were tested for inducing Ac-H3 signals by Western blot. Vinculin was used as a  
686 loading control. **(C)** Ramos HDAC6 (HD6) knock-out (KO) cells were generated and  
687 compared to HDAC6 wild-type (WT) cells. Western Blot analysis shows absence of  
688 HDAC6. Actin serves as a loading control. **(D)** Proliferation was measured of Ramos  
689 HDAC6 WT and Ramos HDAC6 KO cells by cell counting, and normalized to the value of  
690 Ramos HDAC6 WT cells at t=72 h. Two-Way ANOVA (Sidak's posthoc). **(E)** Apoptosis  
691 was analyzed in Ramos HDAC6 WT and Ramos HDAC6 KO cells using Annexin V and  
692 PI staining. **(F)** IC<sub>50</sub> was determined for Ramos HDAC6 WT and Ramos HDAC6 KO cells  
693 treated for 48 h with M-100 or ACY-1215 by MTT assay. All data represent mean + SEM,  
694 if applicable. Data in (A) - (F) are representative of at least three independent experiments.  
695 \**P*<0.05.

696

697

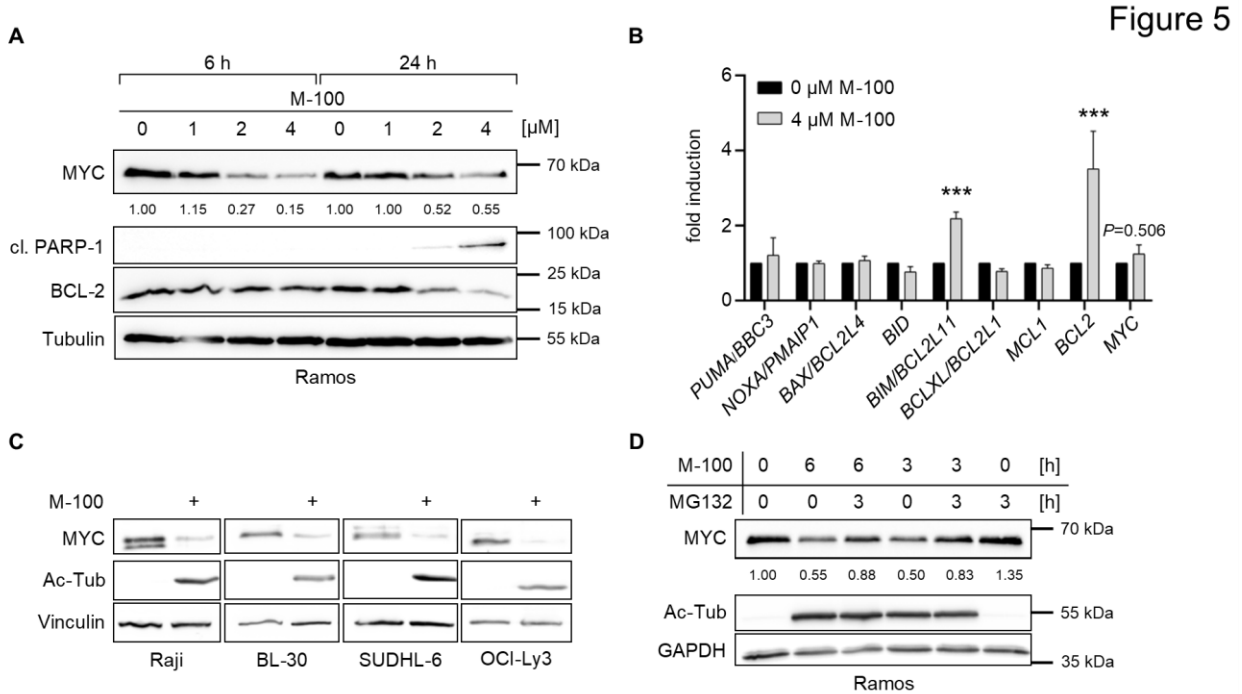

698 **Figure 5: HDAC6 inhibition results in MYC degradation.**

699 **(A)** Western Blot analysis was performed of Ramos cells treated for 6 h or 24 h with 1 μM,  
700 2 μM or 4 μM M-100. Levels of MYC were quantified to untreated conditions. Tubulin was  
701 used as a loading control. cl. - cleaved **(B)** Gene transcription was analyzed of Ramos  
702 cells treated for 24 h with 4 μM M-100 using quantitative real-time PCR analysis. Fold  
703 inductions were calculated using the comparative  $\Delta\Delta\text{CT}$  method based on *GAPDH*  
704 expression. Data represent mean + SEM. Multiple t-test. **(C)** Western Blot analysis was  
705 performed of indicated cell lines treated for 6 h or 24 h with 4 μM M-100. Vinculin was  
706 used as a loading control. Ac-Tub - acetylated Tubulin. **(D)** Western Blot analysis was  
707 performed of Ramos cells treated with 10 μM MG132 to block proteasomal degradation  
708 and/or 4 μM M-100 for the indicated time points. Levels of MYC were quantified to  
709 untreated conditions. GAPDH was used as a loading control. Data in (A) - (D) are  
710 representative of three independent experiments. \*\*\* $P < 0.001$ .

711

Figure 6

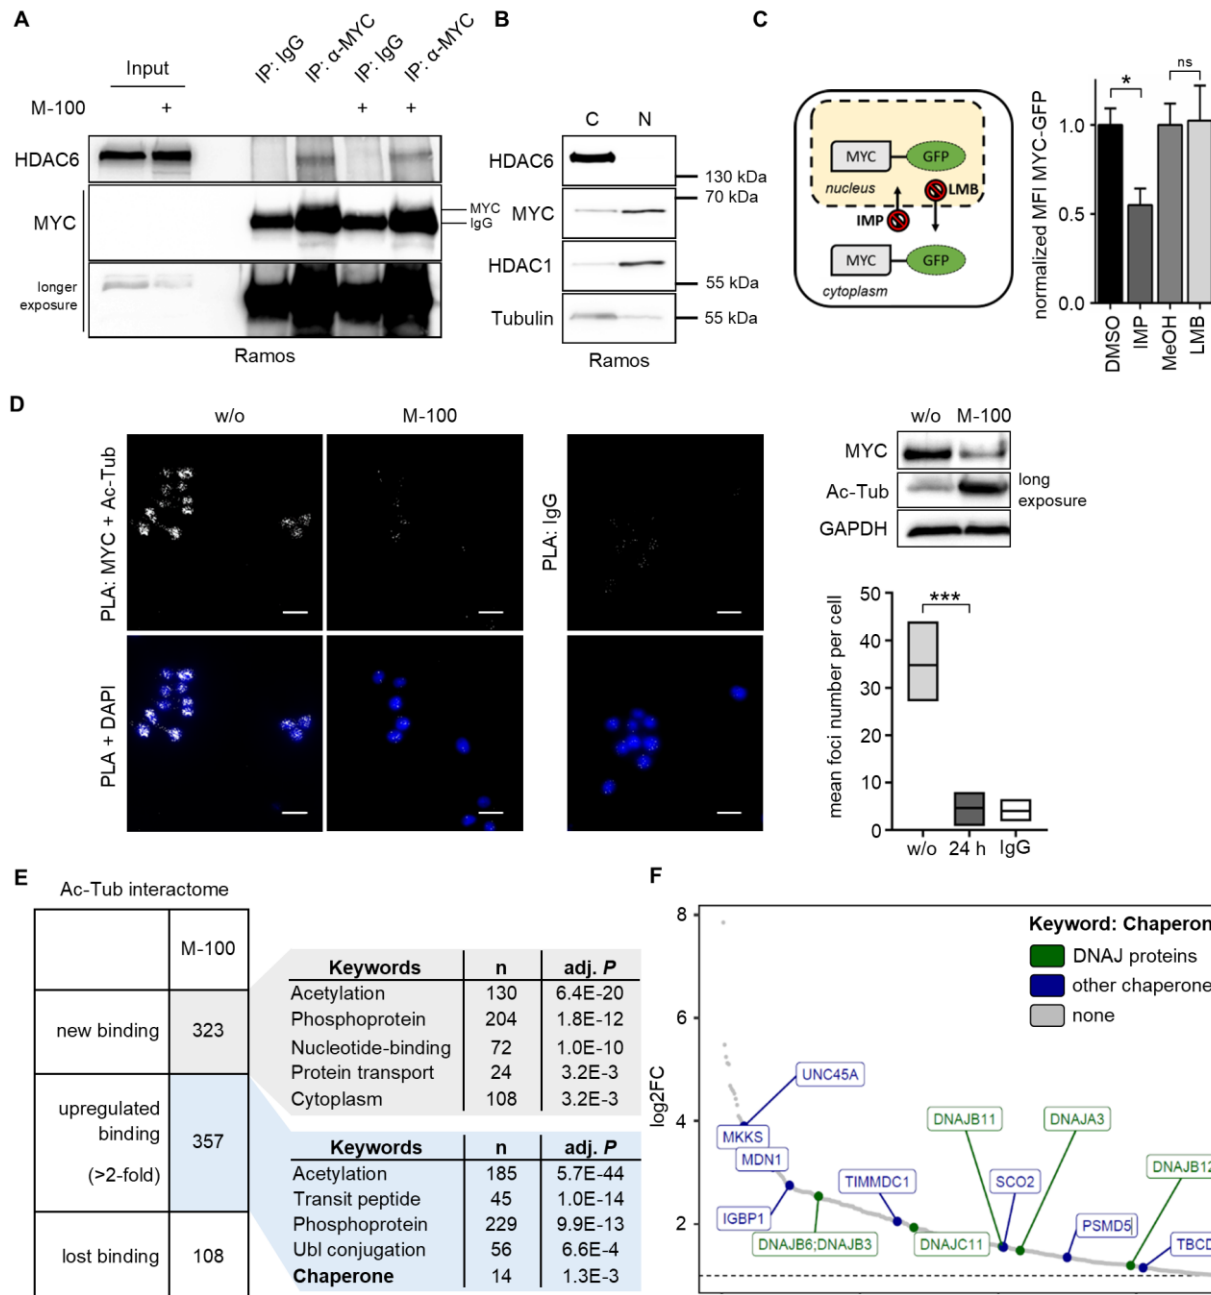

712 **Figure 6: Cytoplasmic MYC degradation is associated with changes in the**  
 713 **interactome of Ac-Tubulin.**

714 **(A)** Ramos cells were treated for 24 h with 4  $\mu$ M M-100 or left untreated. Lysates were  
 715 used for IP with  $\alpha$ -MYC antibodies and tested for HDAC6 interaction. IPs with unspecific  
 716 IgG were used as control. **(B)** Cytoplasmic and nuclear fractions were prepared from  
 717 Ramos cells. HDAC1 was used as a nuclear marker and Tubulin as a cytoplasmic marker.

718 **(C)** NIH-3T3 cells overexpressing MYC-GFP were challenged for 1 h with inhibitors of  
719 nuclear import (Importazole, IMP; 40  $\mu$ M), nuclear export (Leptomycin B, LMB; 20 ng/ml)  
720 or solvent. Next, cells were treated for 90 min with CHX (50  $\mu$ g/ml) before flow cytometry.  
721 Living cells were gated using FSC/SSC and normalized median fluorescence intensity  
722 (MFI) of MYC-GFP was calculated. Data represent mean + SEM. Unpaired Student's  
723 t-test. **(D)** PLA was performed to detect endogenous co-localization of MYC and Ac-  
724 Tubulin (Ac-Tub) in Ramos cells. Cells were treated with 4  $\mu$ M M-100 for 24 h. Staining  
725 with unspecific IgG was used as a control. DAPI was used to stain nuclei. Scale bars  
726 indicate 20  $\mu$ M. Western blot analysis depicts representative protein levels of MYC and  
727 Ac-Tub (long exposure) after 6 h M-100 treatment. PLA foci were counted and compared.  
728 One-Way ANOVA (Dunnett's posthoc). **(E)** Global interactome analysis was carried out of  
729 immunoprecipitated Ac-Tub via mass spectrometry. MV4-11 cells were treated for 24 h  
730 with 0.5  $\mu$ M M-100. Shown are counts of proteins with new or increased (>2-fold) binding  
731 to Ac-Tub, or loss of binding after treatment compared to control and IgG binding. Uniprot  
732 (UP) keyword annotation was performed with DAVID using all proteins that bound to Ac-  
733 Tub after M-100 treatment. Adjusted (adj.) *P*-values are given. Ubl - Ubiquitin-like. **(F)** All  
734 proteins belonging to the keyword "Chaperone" are depicted with their corresponding log2  
735 fold change (FC). DNAJ proteins are marked in green. Data in (A) and (C) are  
736 representative of three independent experiments. Data in (B) and (D) are representative  
737 of two independent experiments. \**P*<0.05, \*\*\**P*<0.001.

738

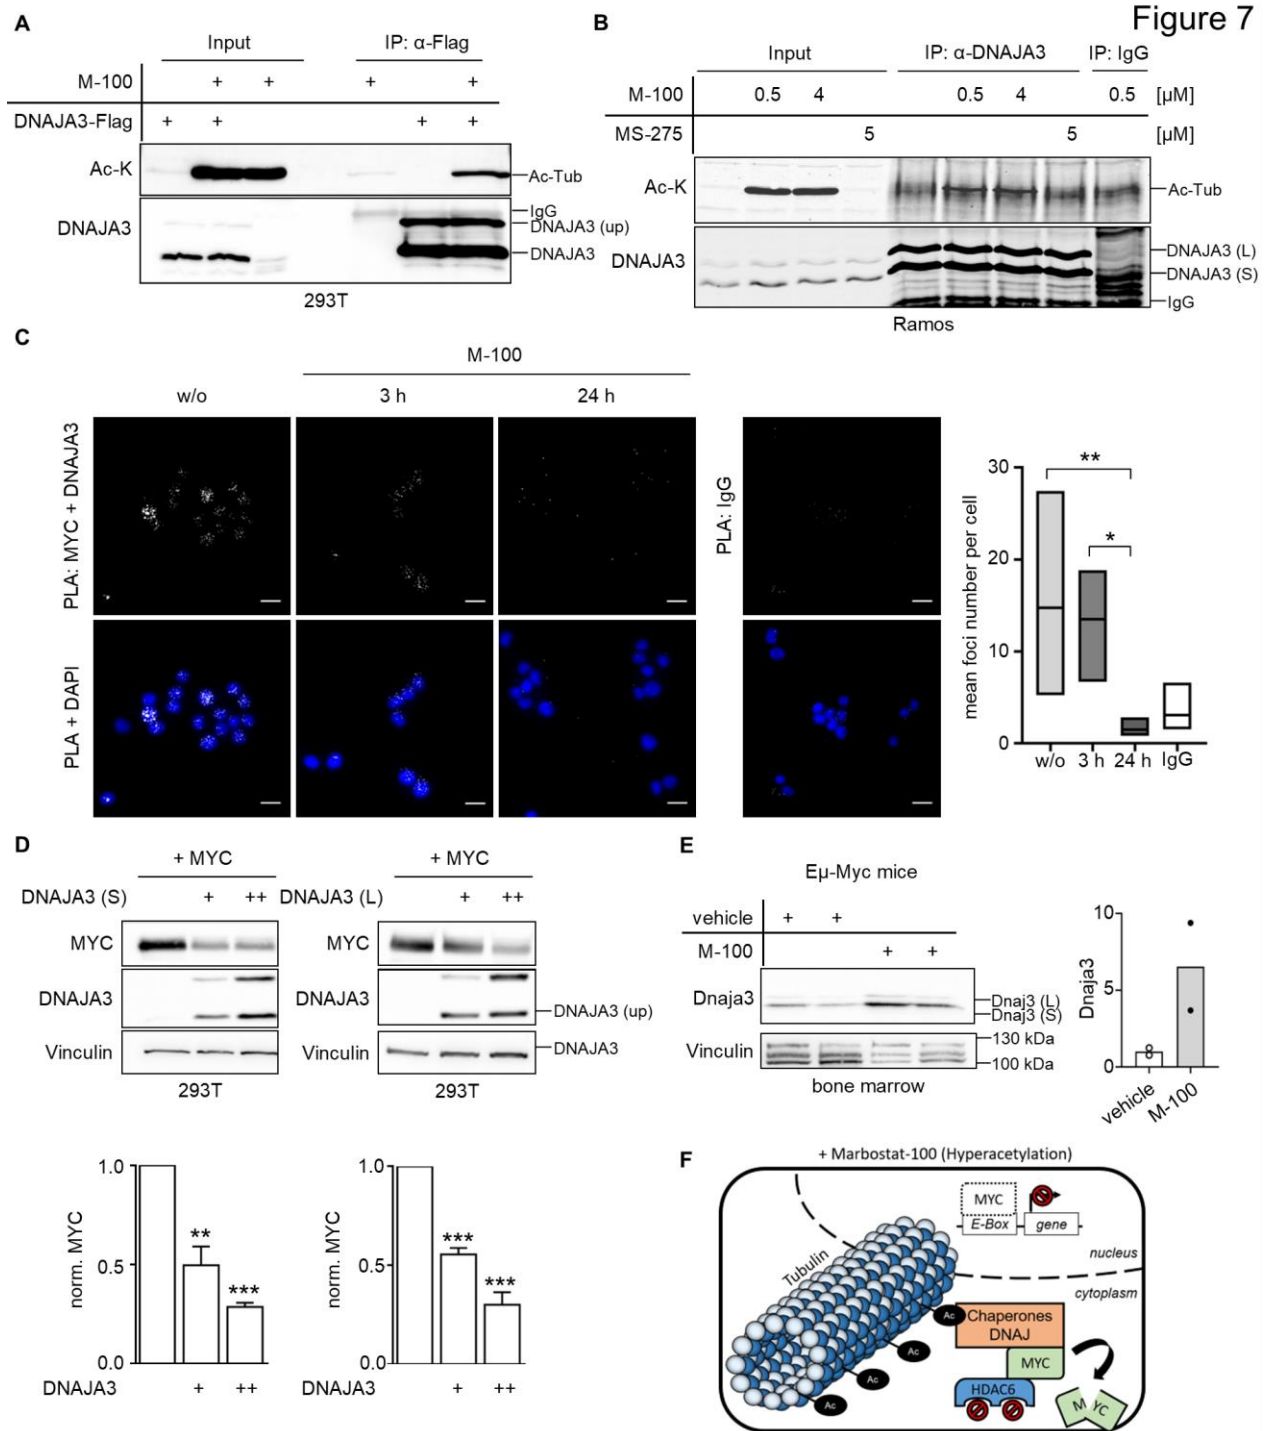

739 **Figure 7: The heat-shock protein DNAJA3 is recruited to hyperacetylated Tubulin**  
 740 **and induces MYC degradation.**

741 **(A)** 293T cells were transfected with plasmids encoding DNAJA3-Flag and were treated  
 742 for 24 h with 1  $\mu$ M M-100 or left untreated. Cells were lysed in stringent lysis buffer



743 containing 1  $\mu$ M M-100. Lysates were used for IP with  $\alpha$ -Flag antibodies to precipitate  
744 DNAJA3-Flag and tested for interaction with acetylated Tubulin (Ac-Tub). Overexpression  
745 of DNAJA3 generates unprocessed (up) precursor proteins. **(B)** Ramos cells were treated  
746 for 24 h with either 0.5  $\mu$ M, 4  $\mu$ M M-100, 5  $\mu$ M MS-275, or left untreated. Lysates were  
747 used for IP with  $\alpha$ -DNAJA3 antibodies and tested for interaction with Ac-Tub. IPs with  
748 unspecific IgG were used as control. **(C)** PLA was performed to detect endogenous co-  
749 localization of MYC and DNAJA3 in Ramos cells. Cells were treated with 4  $\mu$ M M-100 for  
750 the indicated time points. Staining with unspecific IgG was used as a control. DAPI was  
751 used to stain nuclei. Scale bars indicate 20  $\mu$ M. PLA foci were counted and compared.  
752 One-Way ANOVA (Dunnett's posthoc). **(D)** Western Blot analysis was performed of 293T  
753 cells overexpressing increasing amounts of the small (S) or large (L) isoform of DNAJA3,  
754 and MYC. Vinculin was used as a loading control. Quantification of MYC was performed  
755 based on Vinculin. Data represent normalized mean + SEM. Unpaired Student's t-test. **(E)**  
756 Western Blot analysis was performed of bone marrow lysates from E $\mu$ -Myc mice after one  
757 i.p. injection with M-100 (30 mg/kg) or vehicle. Small and large isoforms of Dnaja3 can be  
758 noticed. Vinculin was used as a loading control. Each lane represents one individual  
759 mouse. Quantification of Dnaja3 protein levels is shown based on Vinculin. **(F)** Scheme  
760 summarizing our findings. Hyperacetylation of Tubulin by HDAC6 inhibition results in the  
761 recruitment of Chaperone complexes including the heat-shock protein DNAJA3 to Tubulin.  
762 High levels of DNAJA3 induce degradation of MYC. Data in (A), (B), and (D) are  
763 representative of three independent experiments, data in (C) are representative of two  
764 independent experiments. \* $P$ <0.05, \*\* $P$ <0.01, \*\*\* $P$ <0.001.

765
